# Supplementary material for: Novel Protein Disulfide Isomerase Inhibitor with Anticancer Activity in Multiple Myeloma
Source: Oxford University Press journal article supplement (doi:10.1158/0008-5472.can-15-3099), 2016-04-07

**Figure S1**

**A**

**CCF642**

IUPAC: (5Z)-3-(4-methoxyphenyl)-5-[(5-nitrothiophen-2-yl)methylidene]-2-sulfanylidene-1,3-thiazolidine-4-one


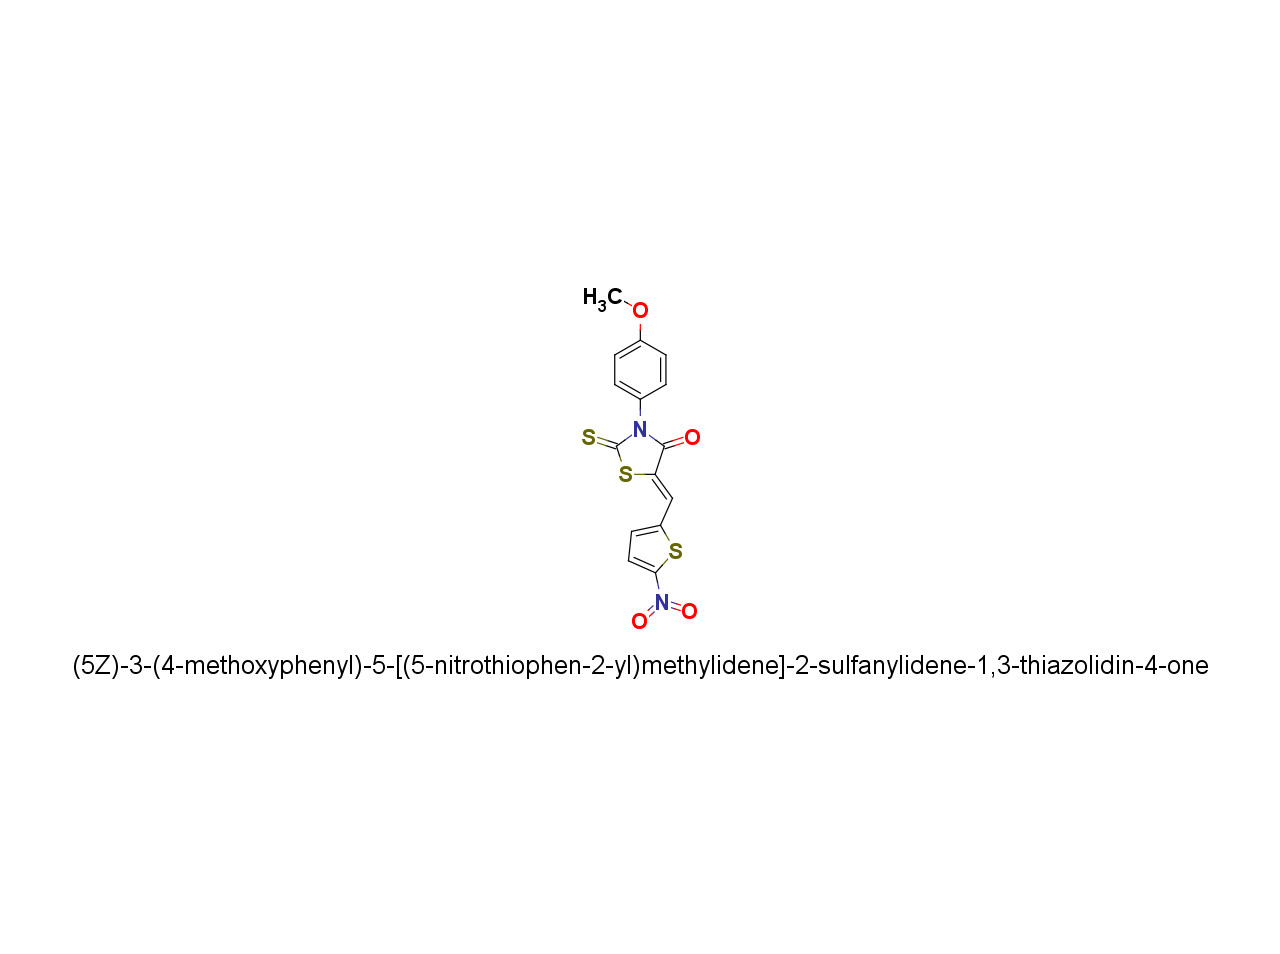


**B**

**HRMS**

HRMS: m/z calcd for M+: 377.9808 ; found: 377.9814

**C**

**H-NMR**


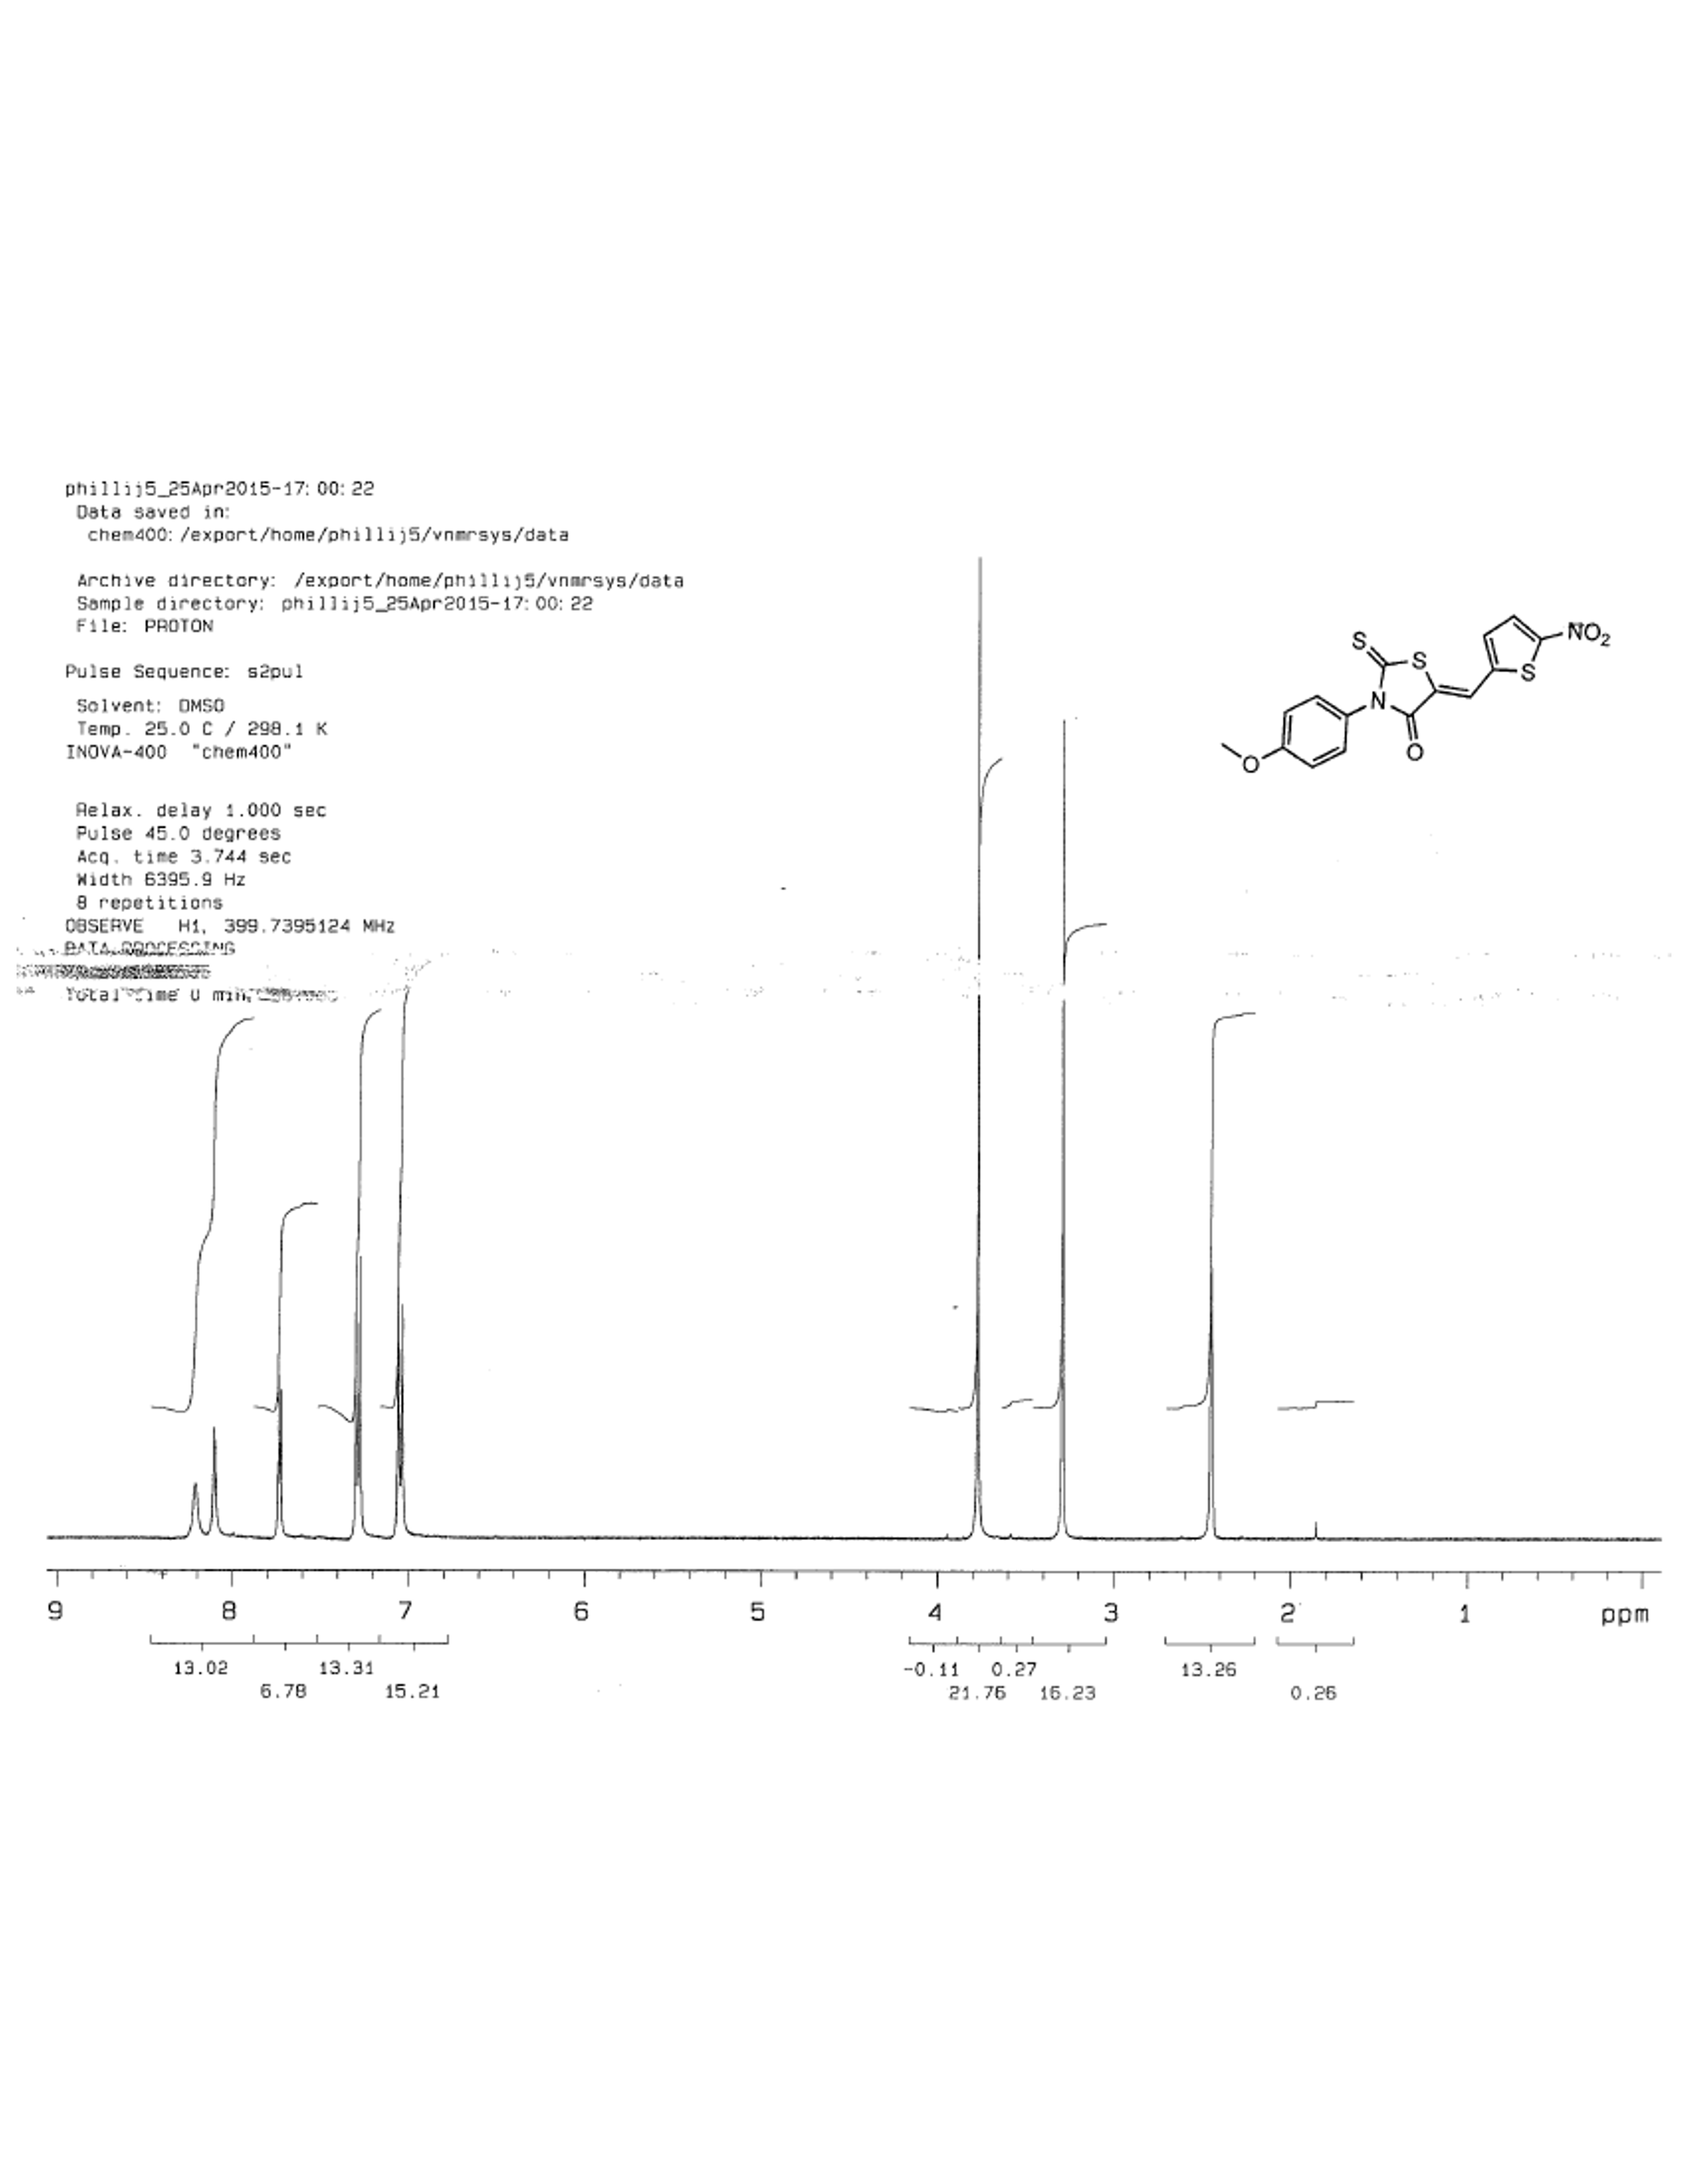


**D**

**B-CCF642**

IUPAC: N-(2-{4-[(5Z)-5-[(5-nitrothiophen-2-yl)methylidene]-4-oxo-2-sulfanylidene-1,3-thiazolidin-3-yl]phenoxy}ethyl)-5-{2-oxo-hexahydrordo-1H-thieno[3,4-d]imidazolidine-4-yl}pentanamide


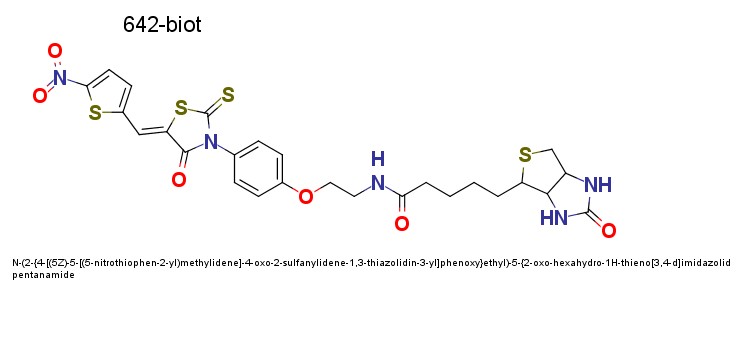


**E**

**HRMS**

HRMS: m/z calcd for (M+H)+: 634.08; found: 634.089

**F**

**H-NMR**


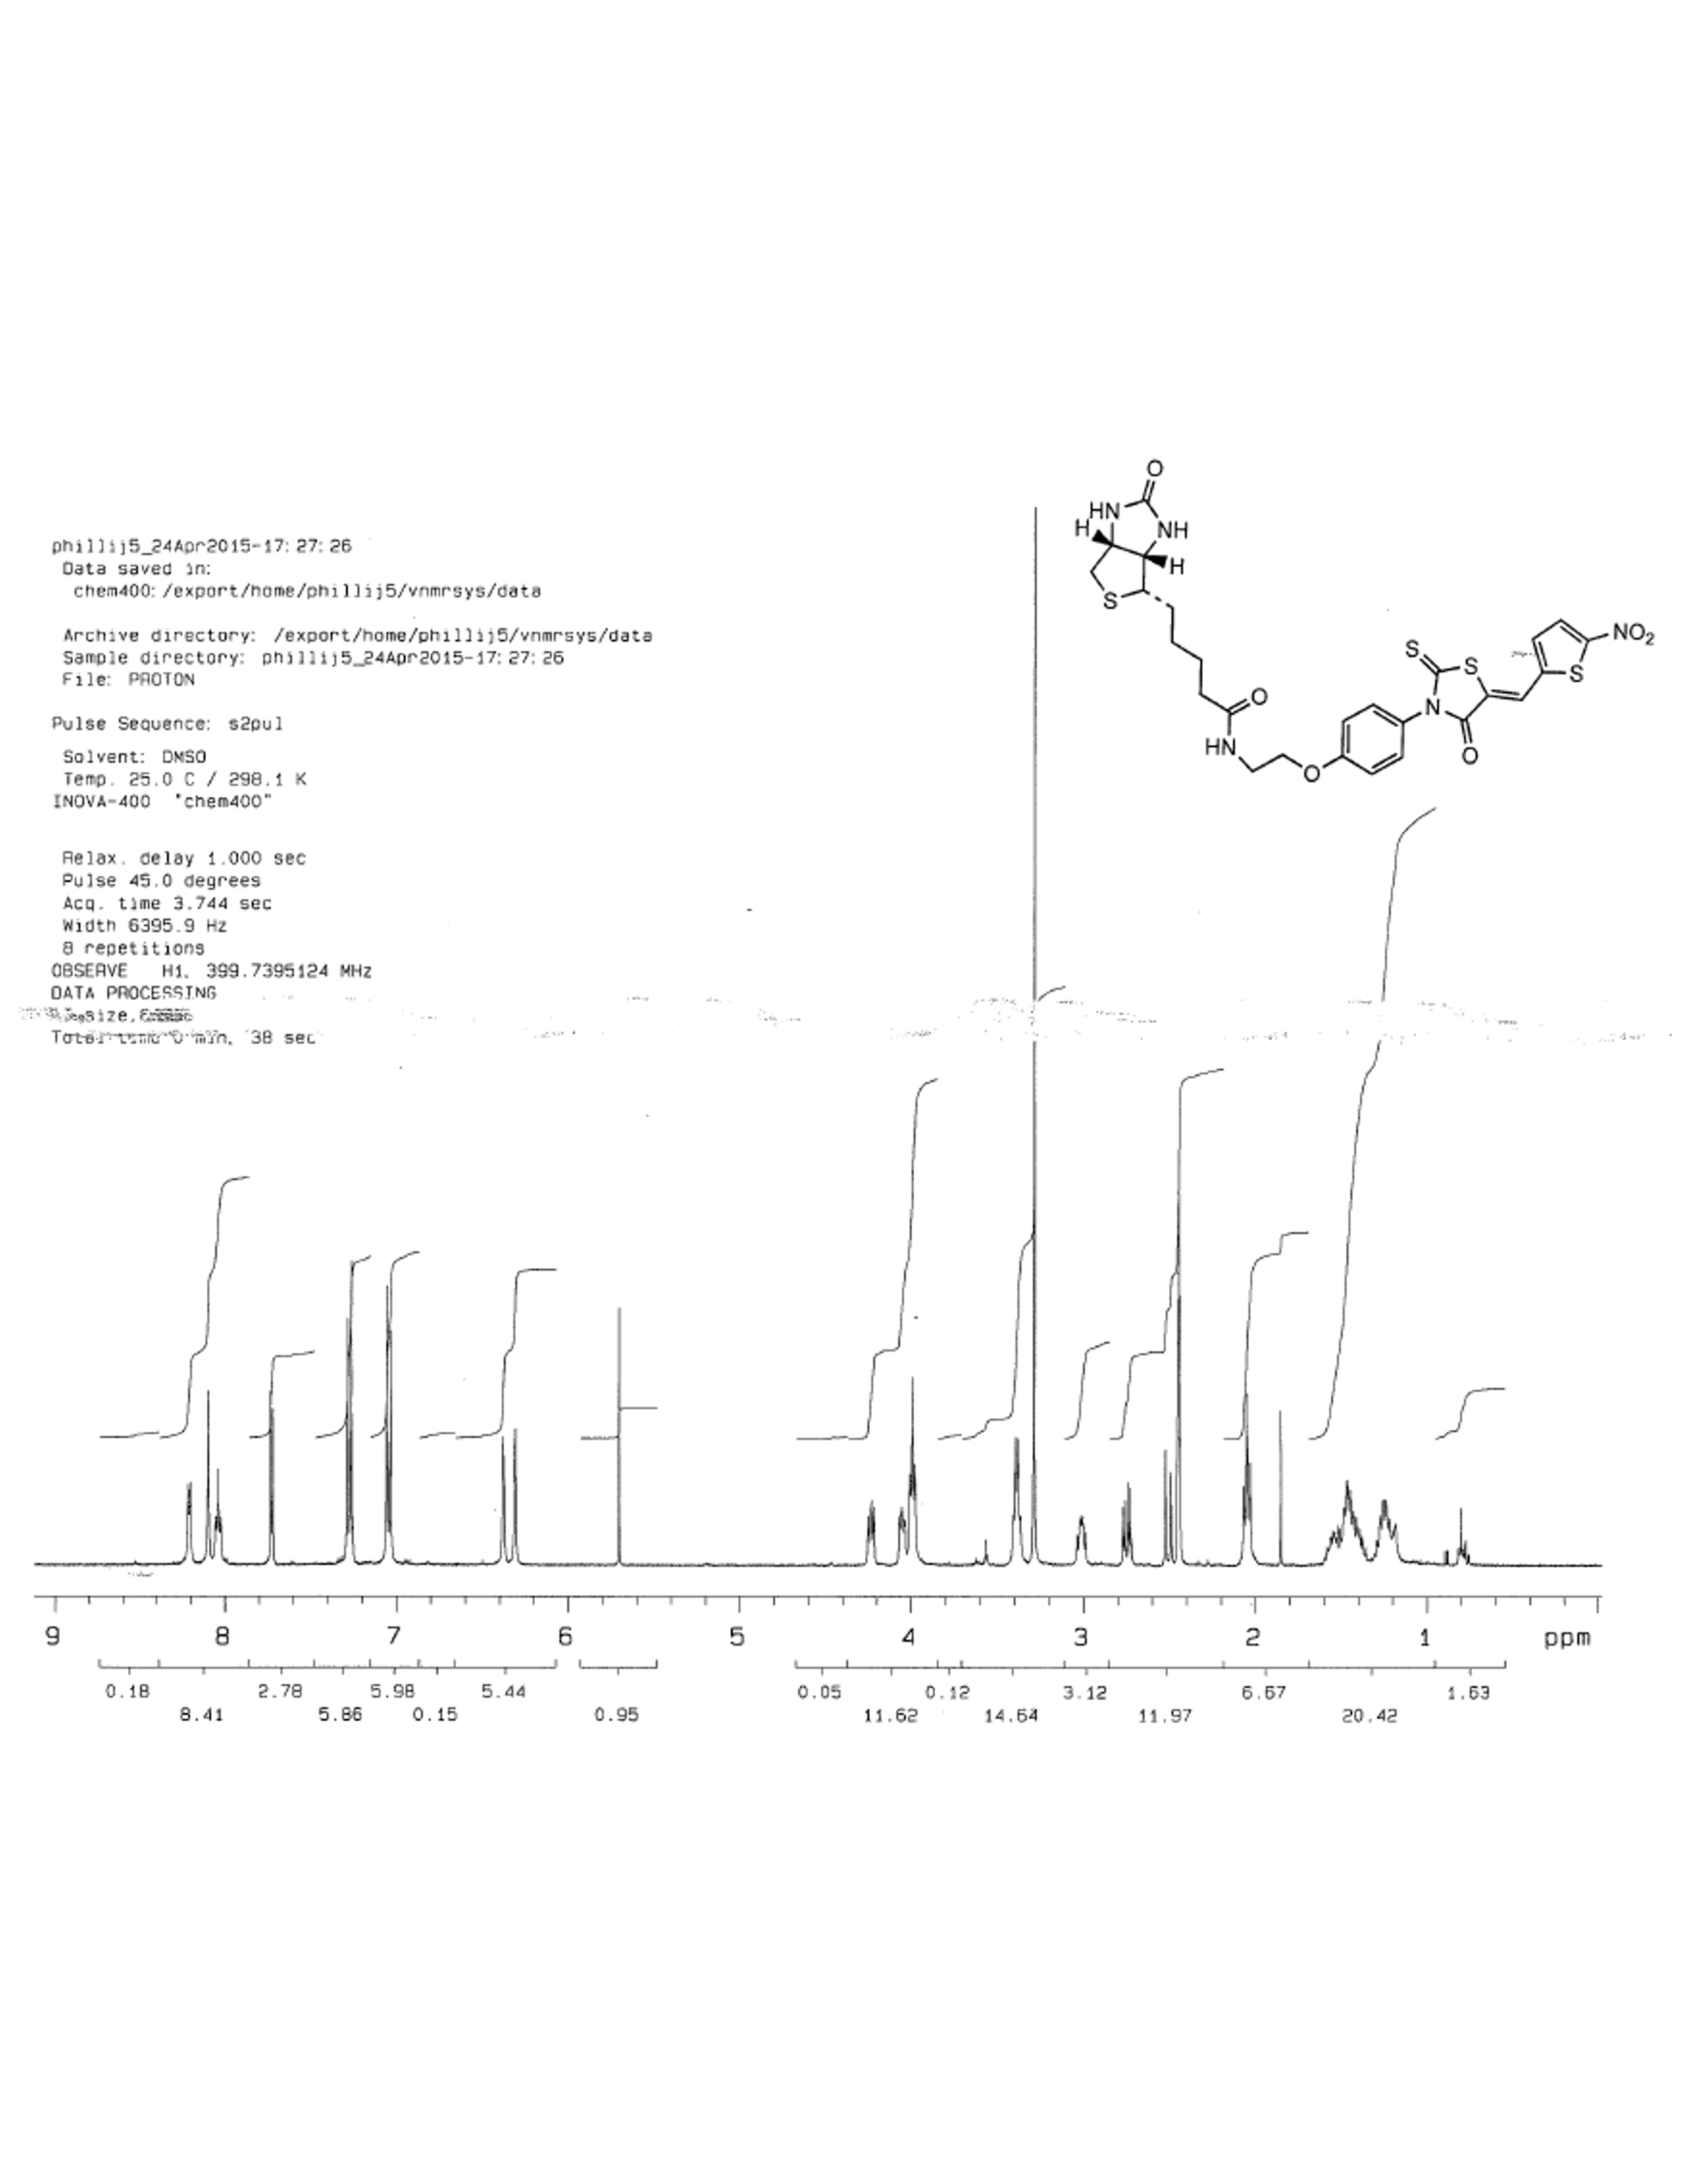


**G**

**CCF642-COOH**

IUPAC: 5-{[(5Z)-3-(4-methoxyphenyl)-4-oxo-2-sulfanylidene-1,3thiazolidine-5-ylidene]methyl}thiphene-2-carboxylic acid


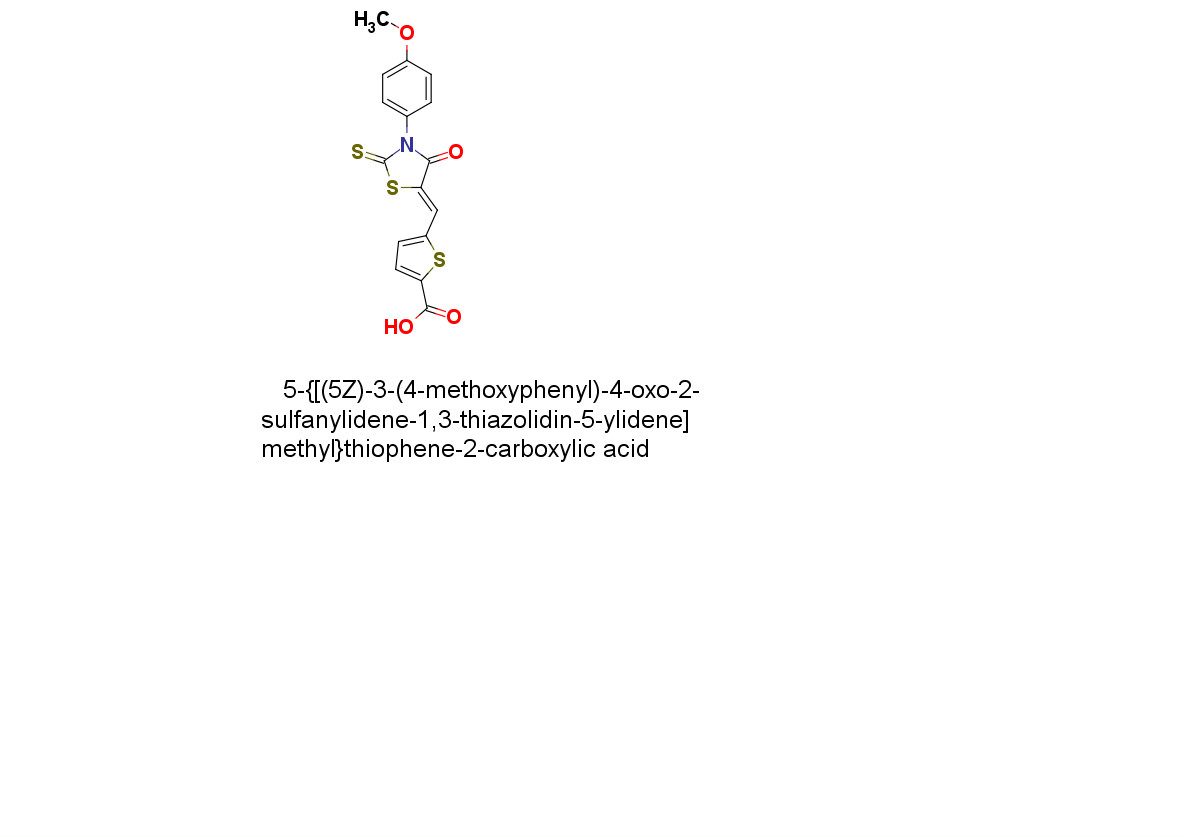


**H**

**HRMS**

HRMS: m/z calcd for (M-H)+: 375.9777; found: 375.9780

**I**

**H-NMR**


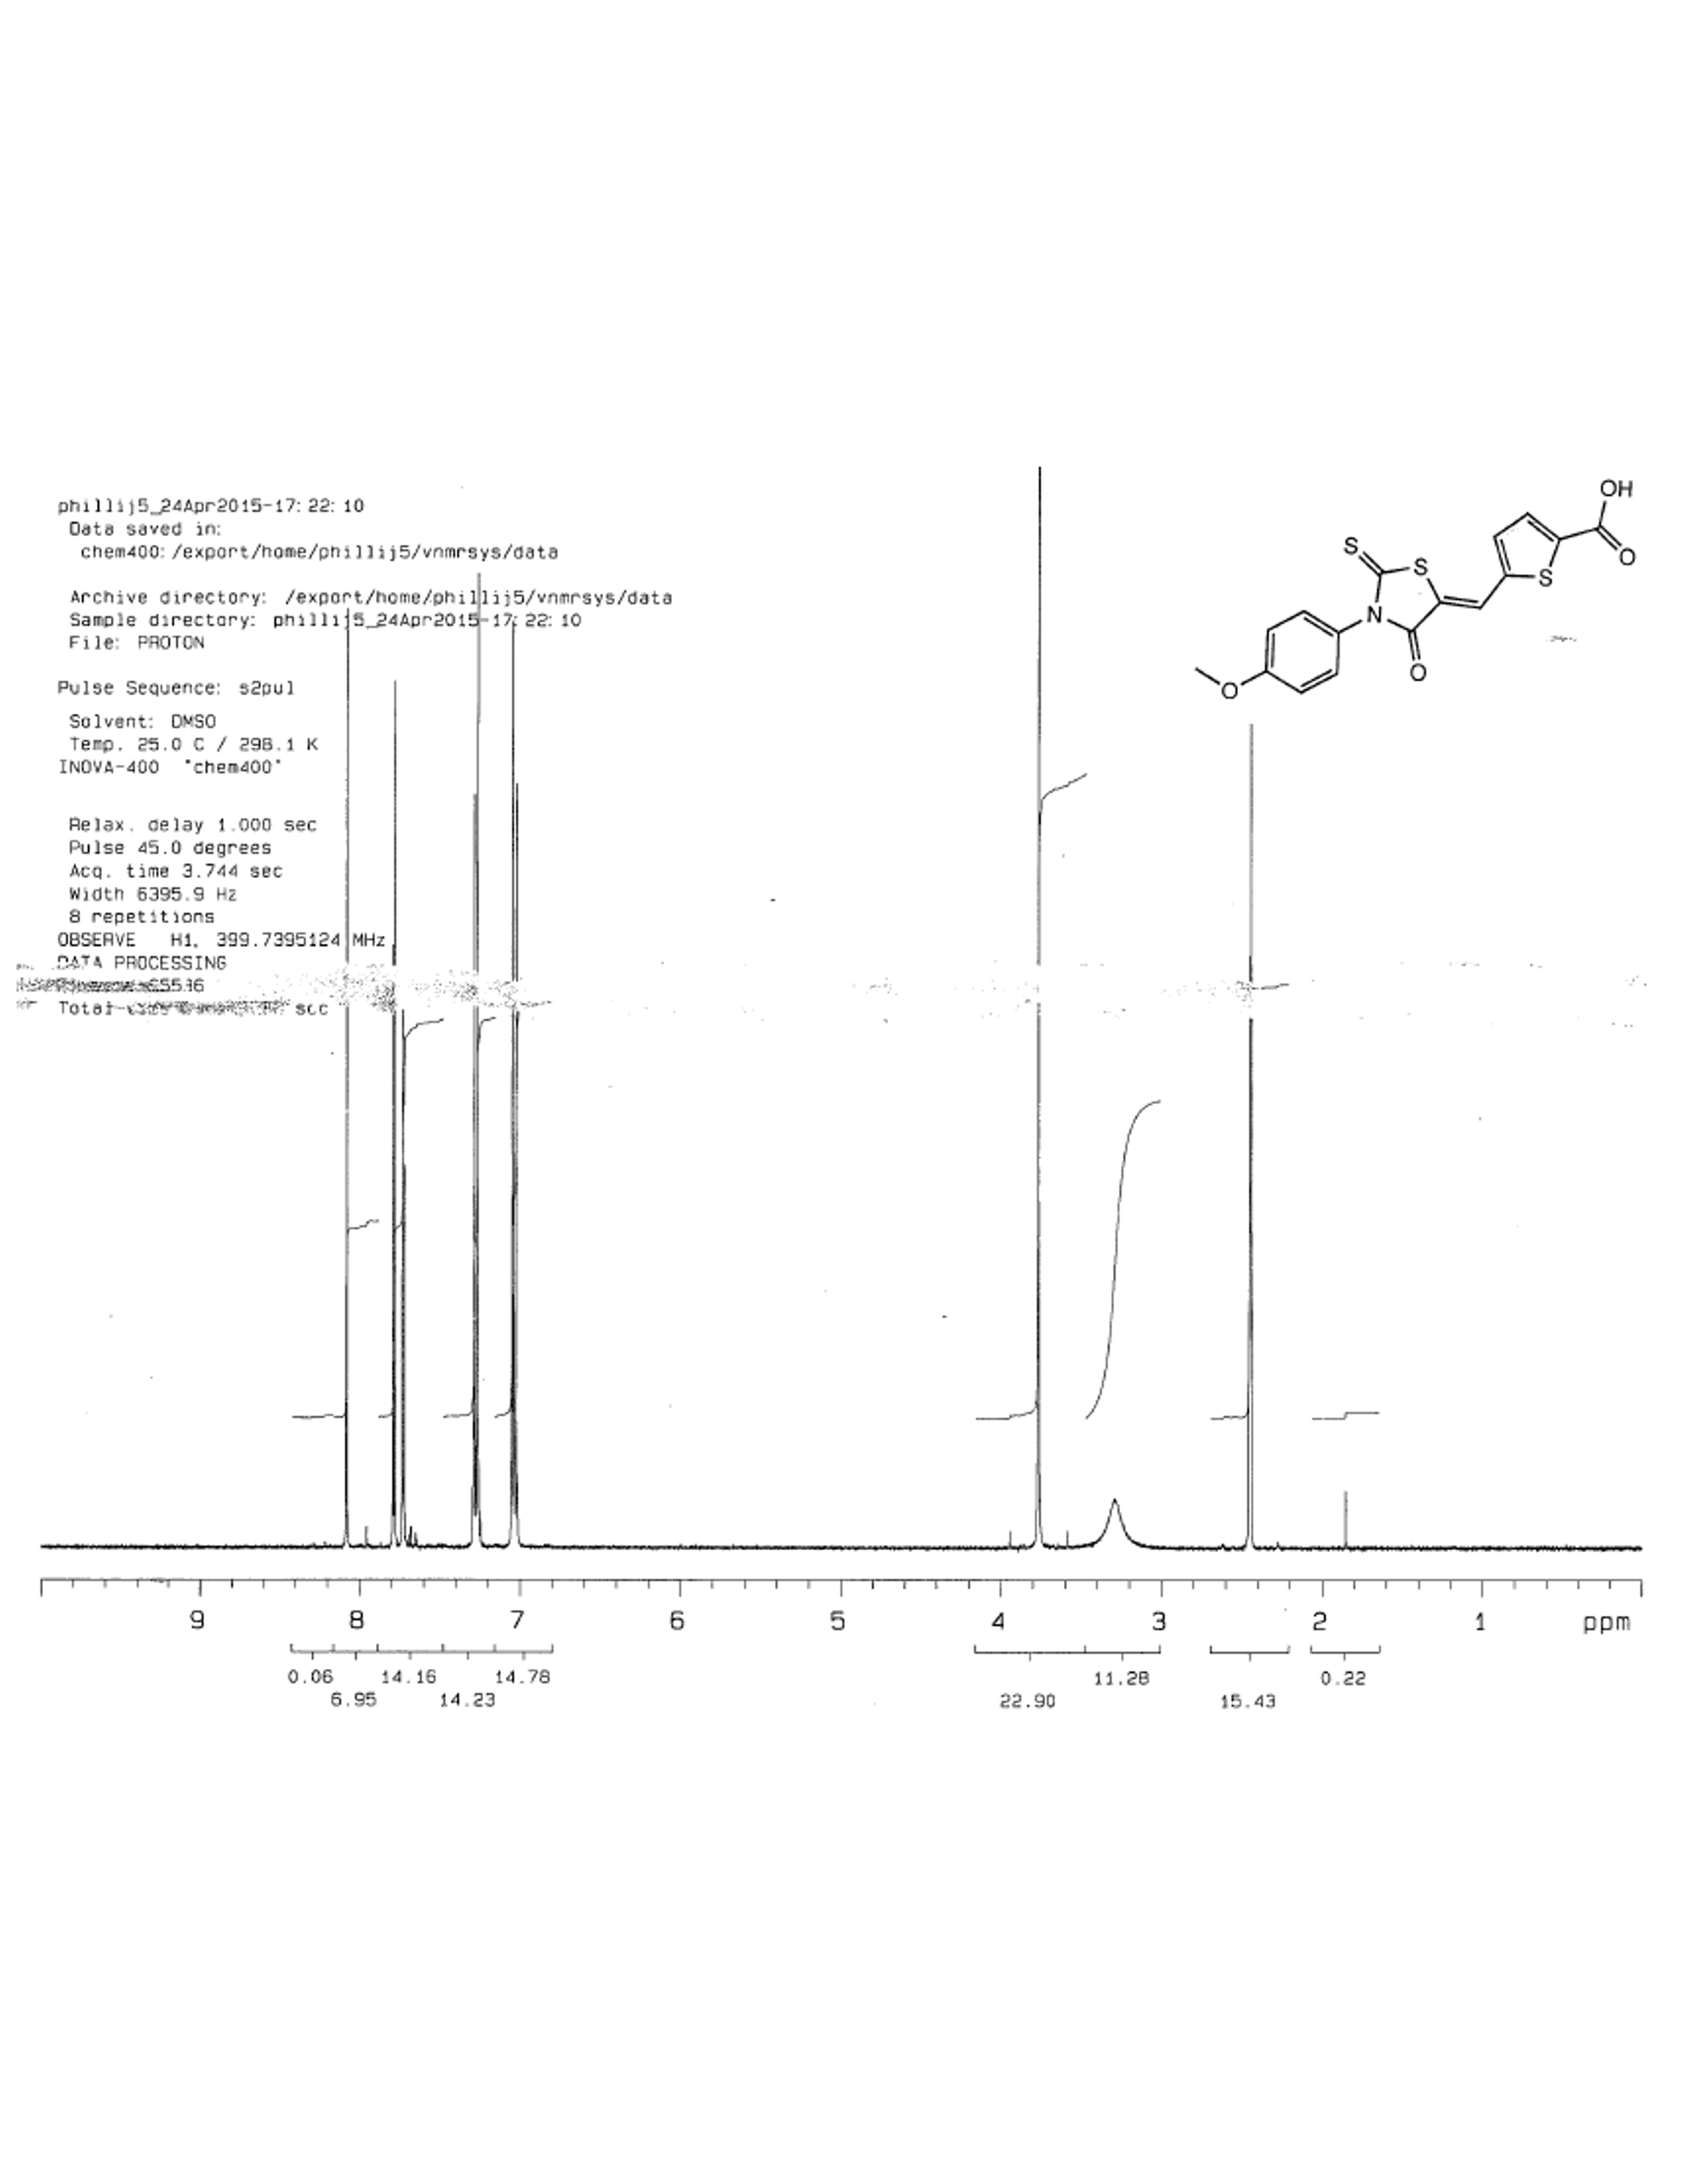

Supplement: 00085472can153099-sup-158057_1_supp_3349727_424vfv.doc [file 00085472can153099-sup-158057_1_supp_3349727_424vfv.doc]
