# Supplementary figures and images for: Novel Protein Disulfide Isomerase Inhibitor with Anticancer Activity in Multiple Myeloma
Source: Oxford University Press journal article supplement (doi:10.1158/0008-5472.can-15-3099), 2016-04-07

**Figure S2**

**
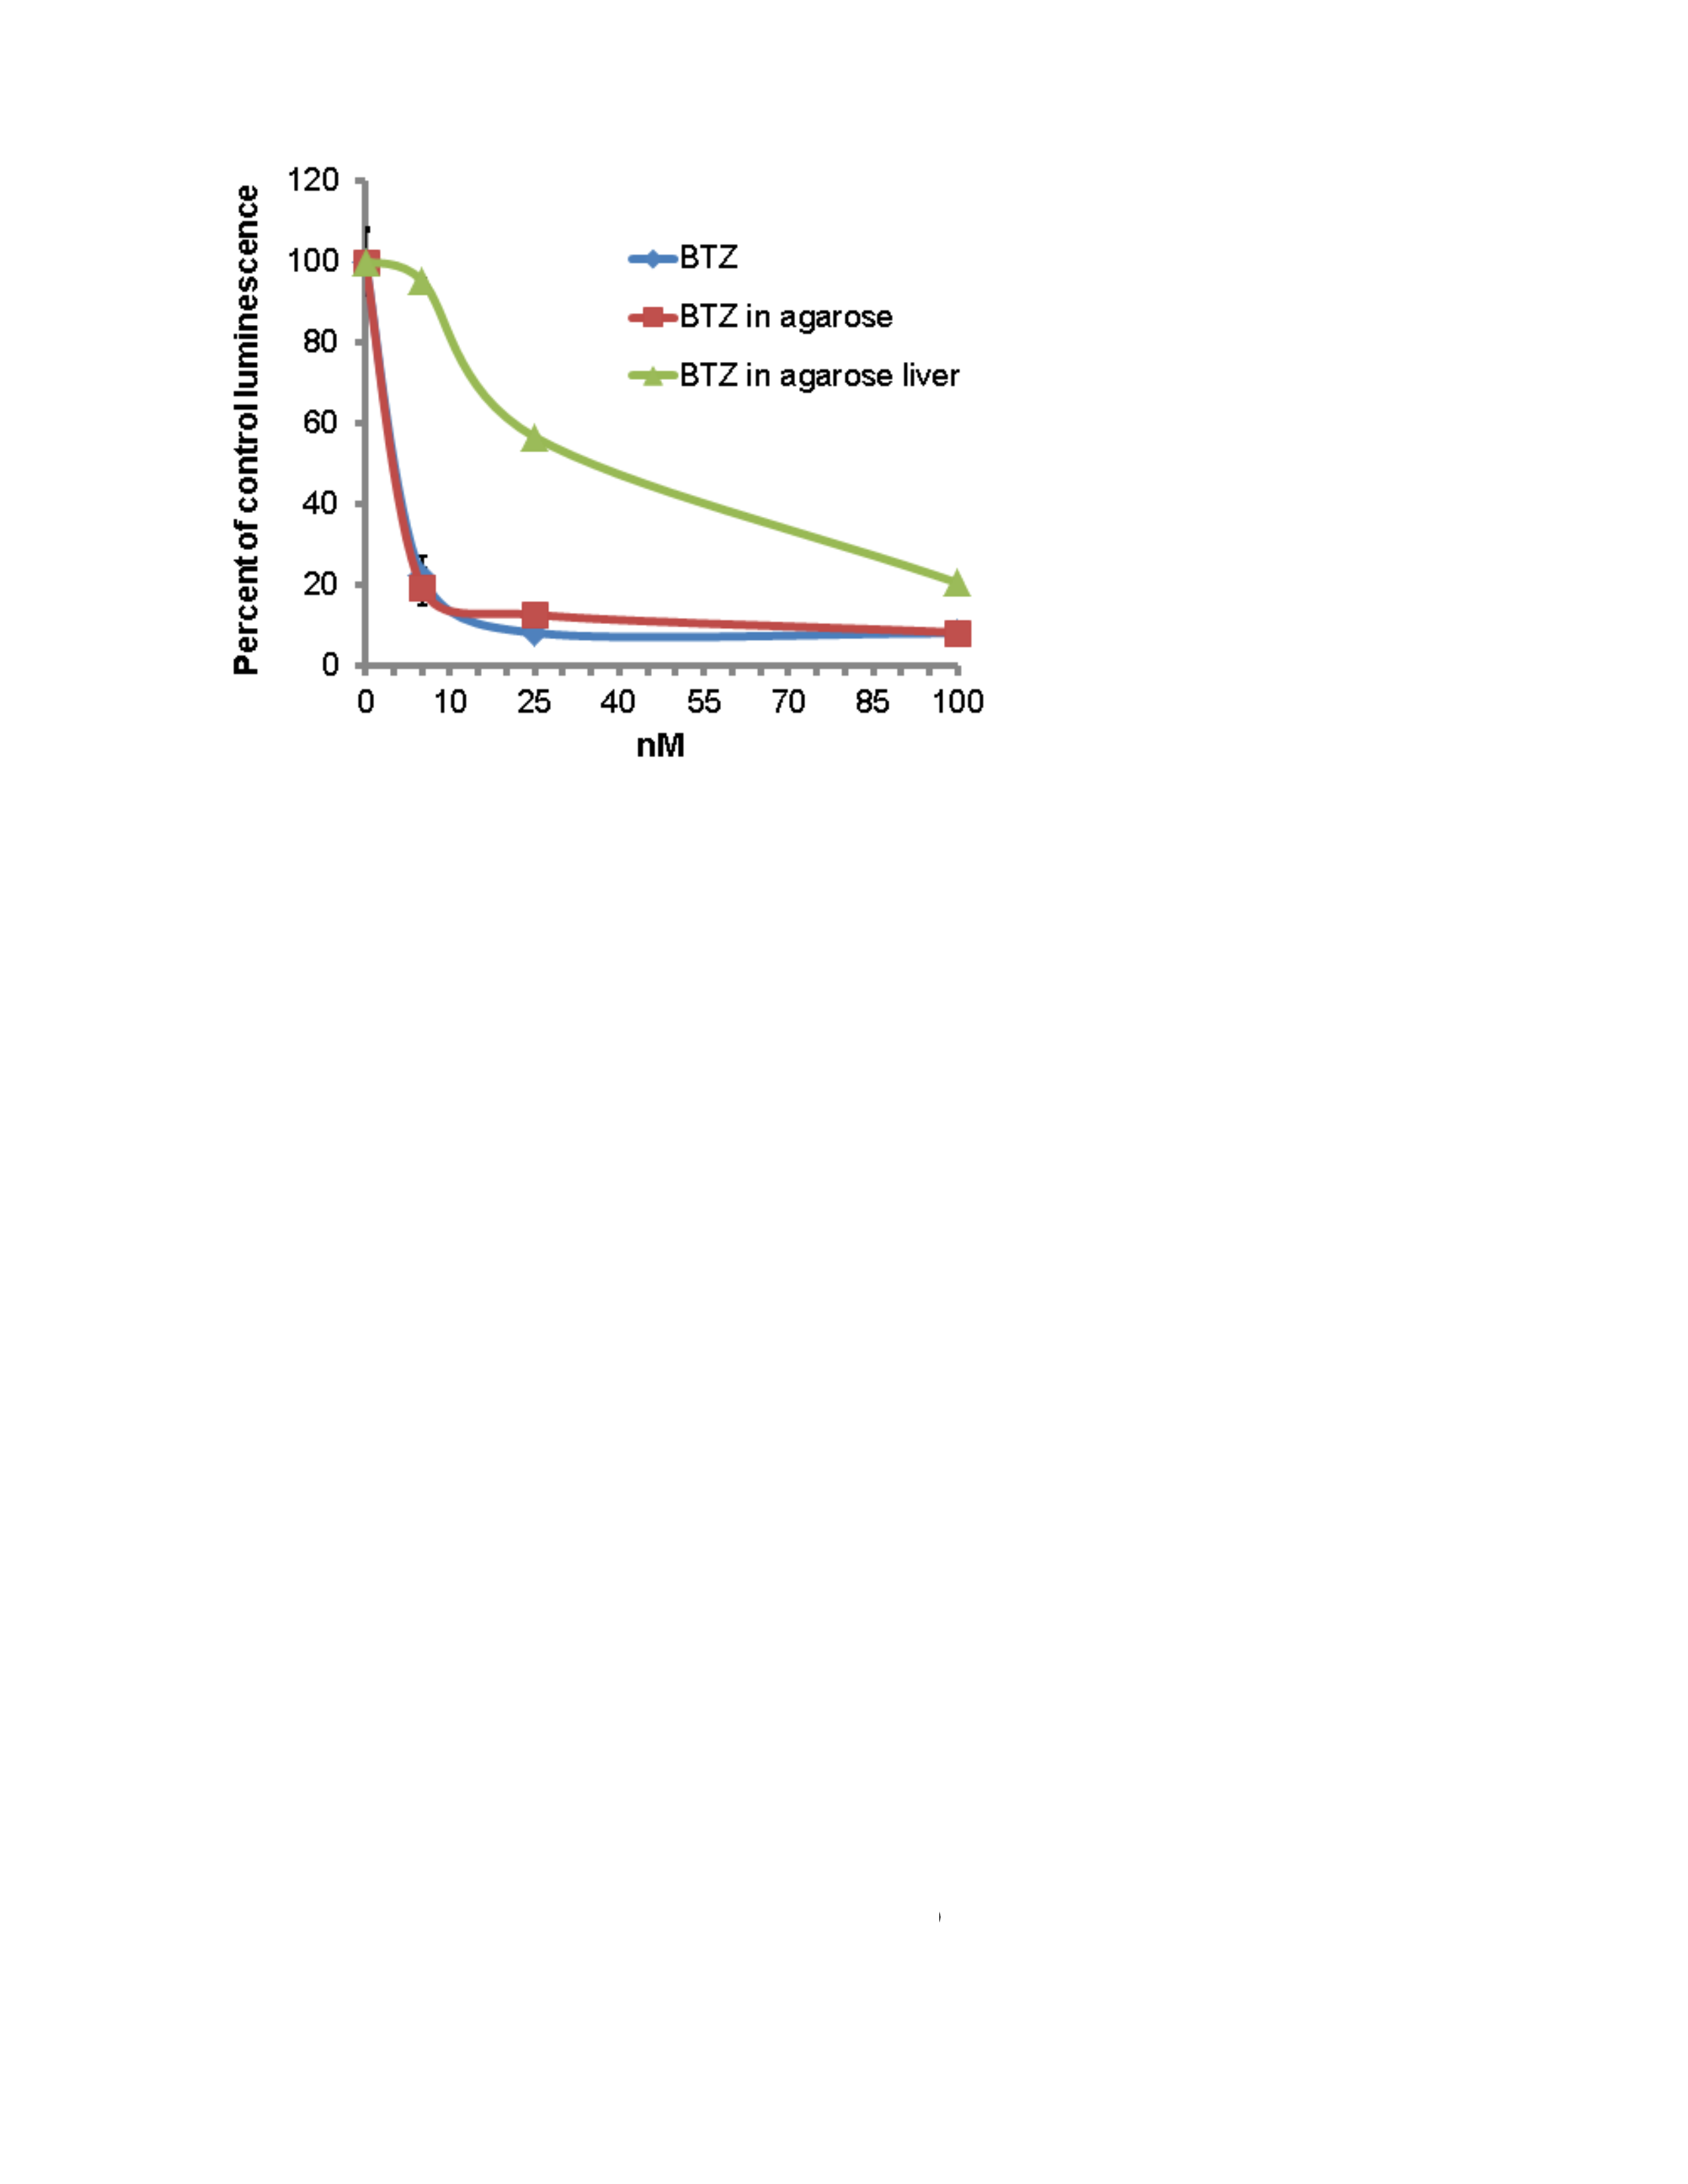
**

**Figure S3**

**
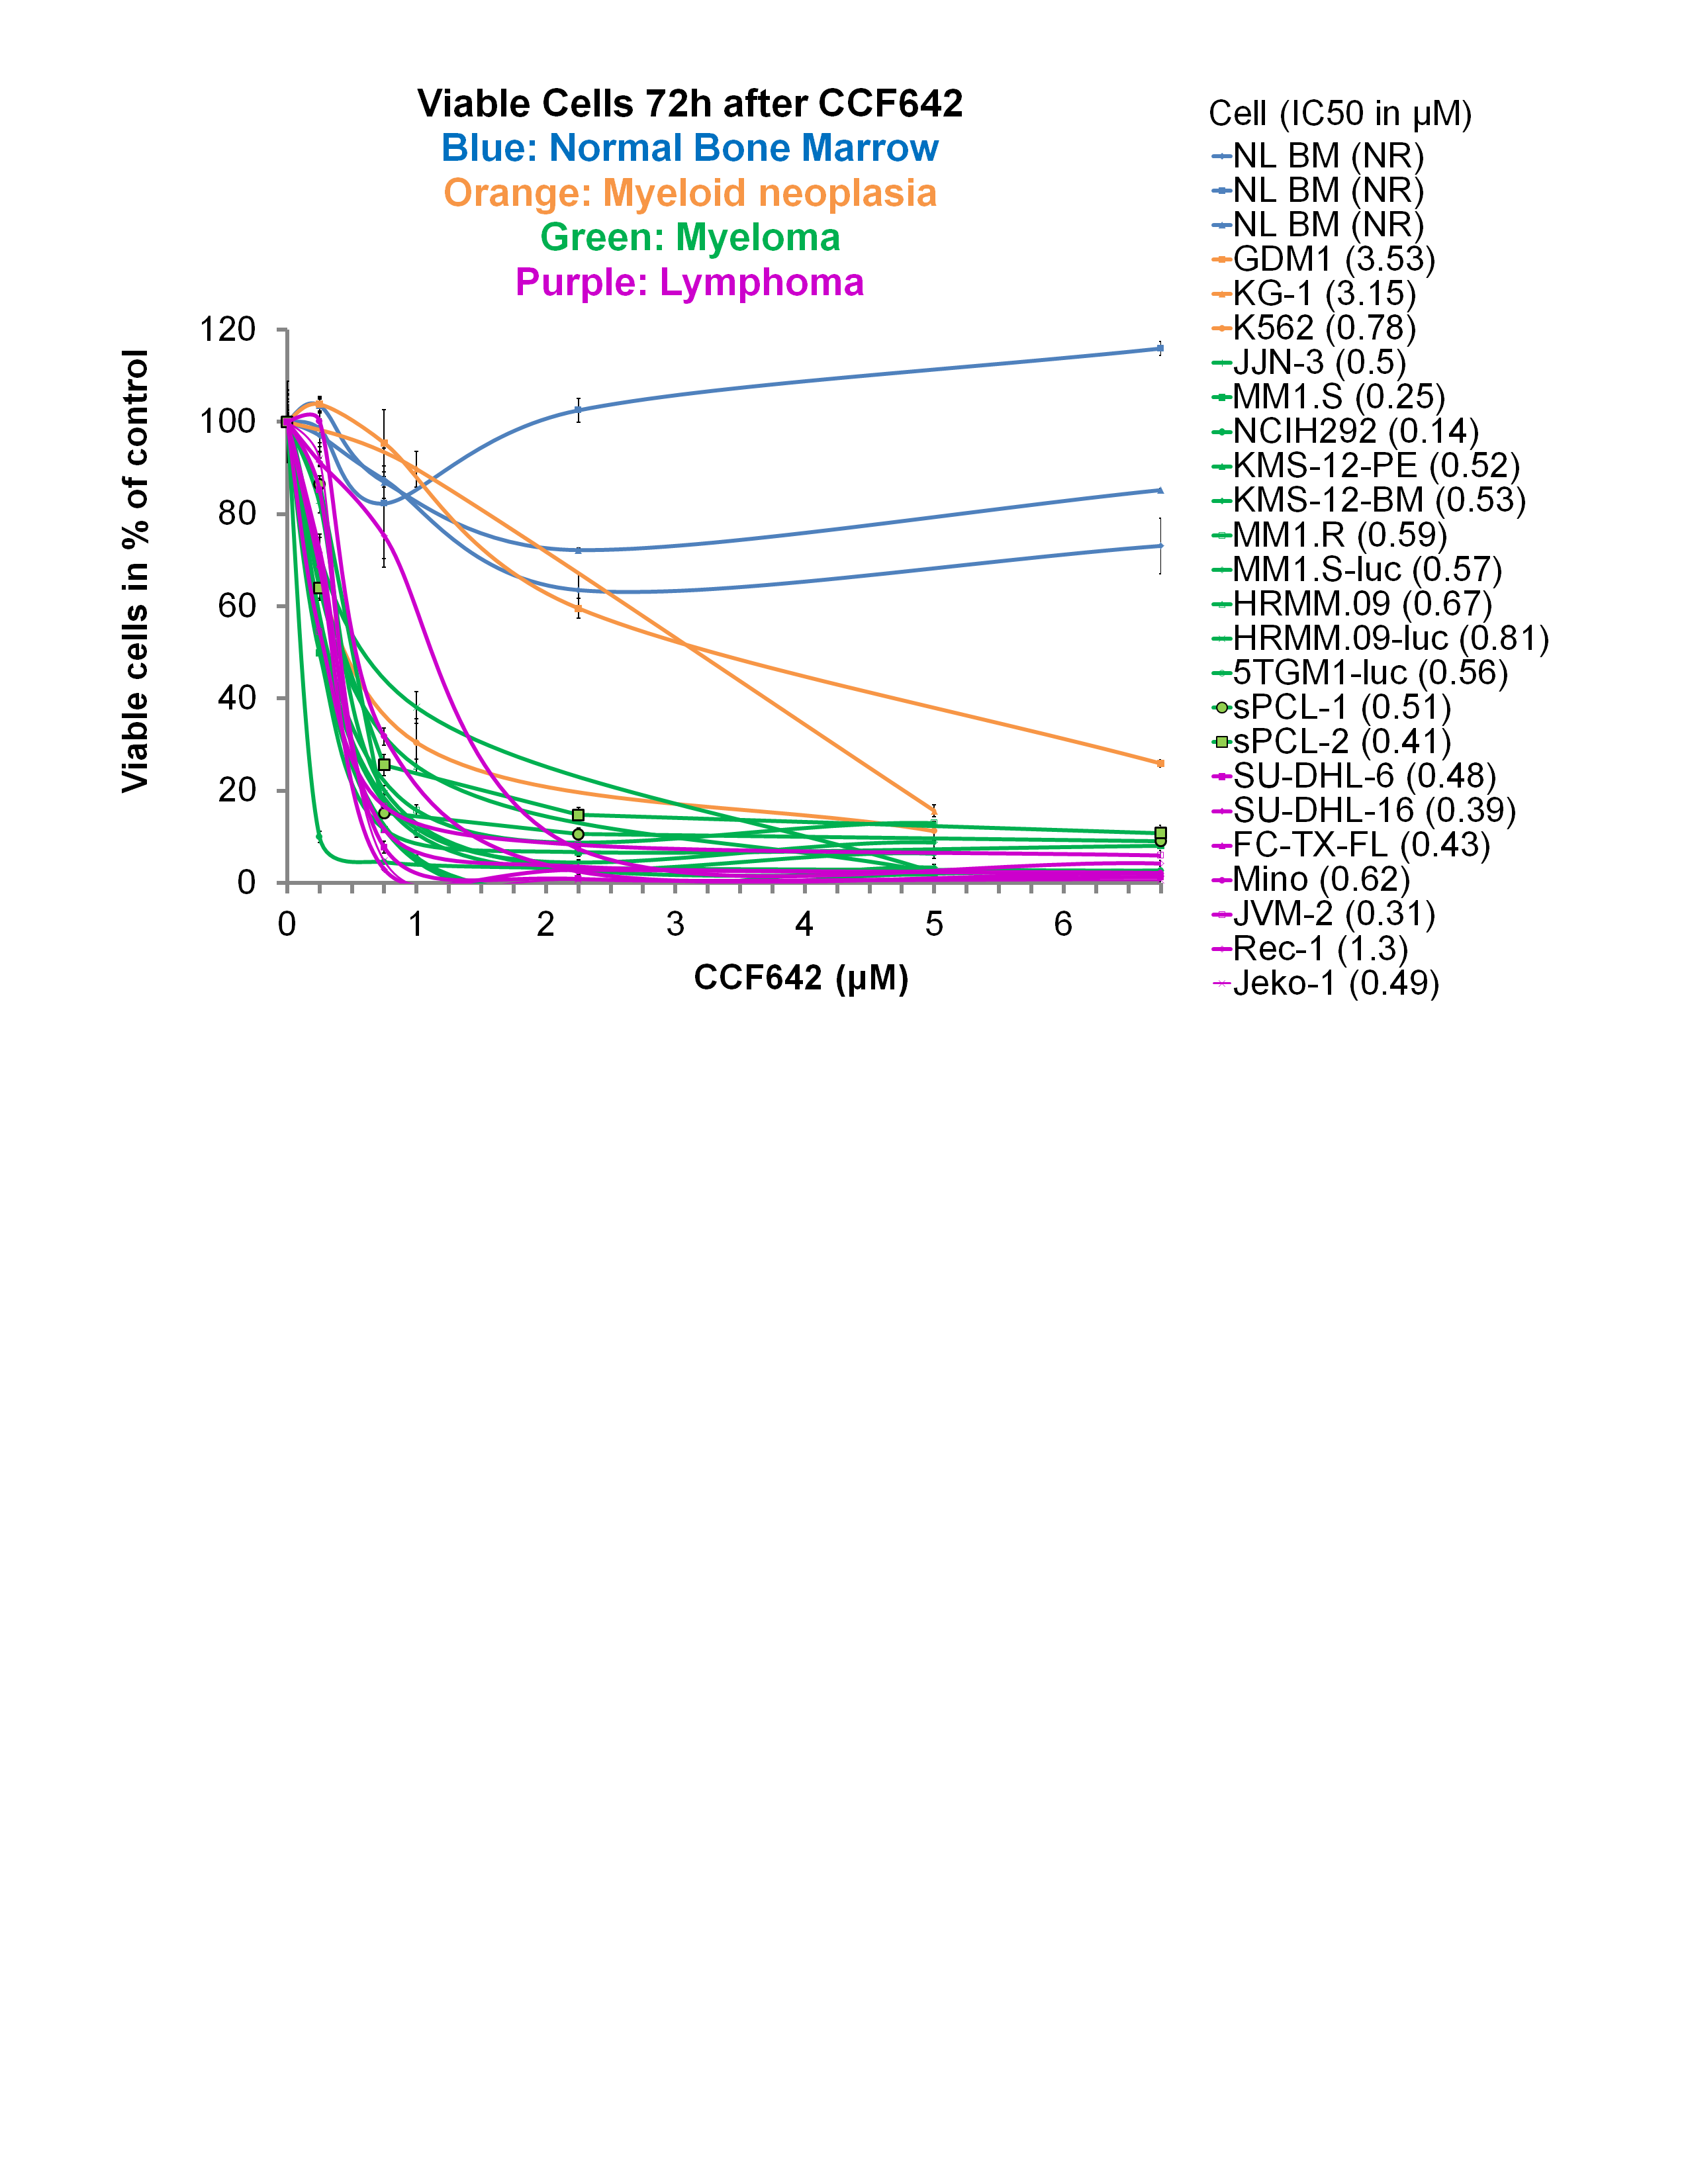
**

**Figure S4**

**
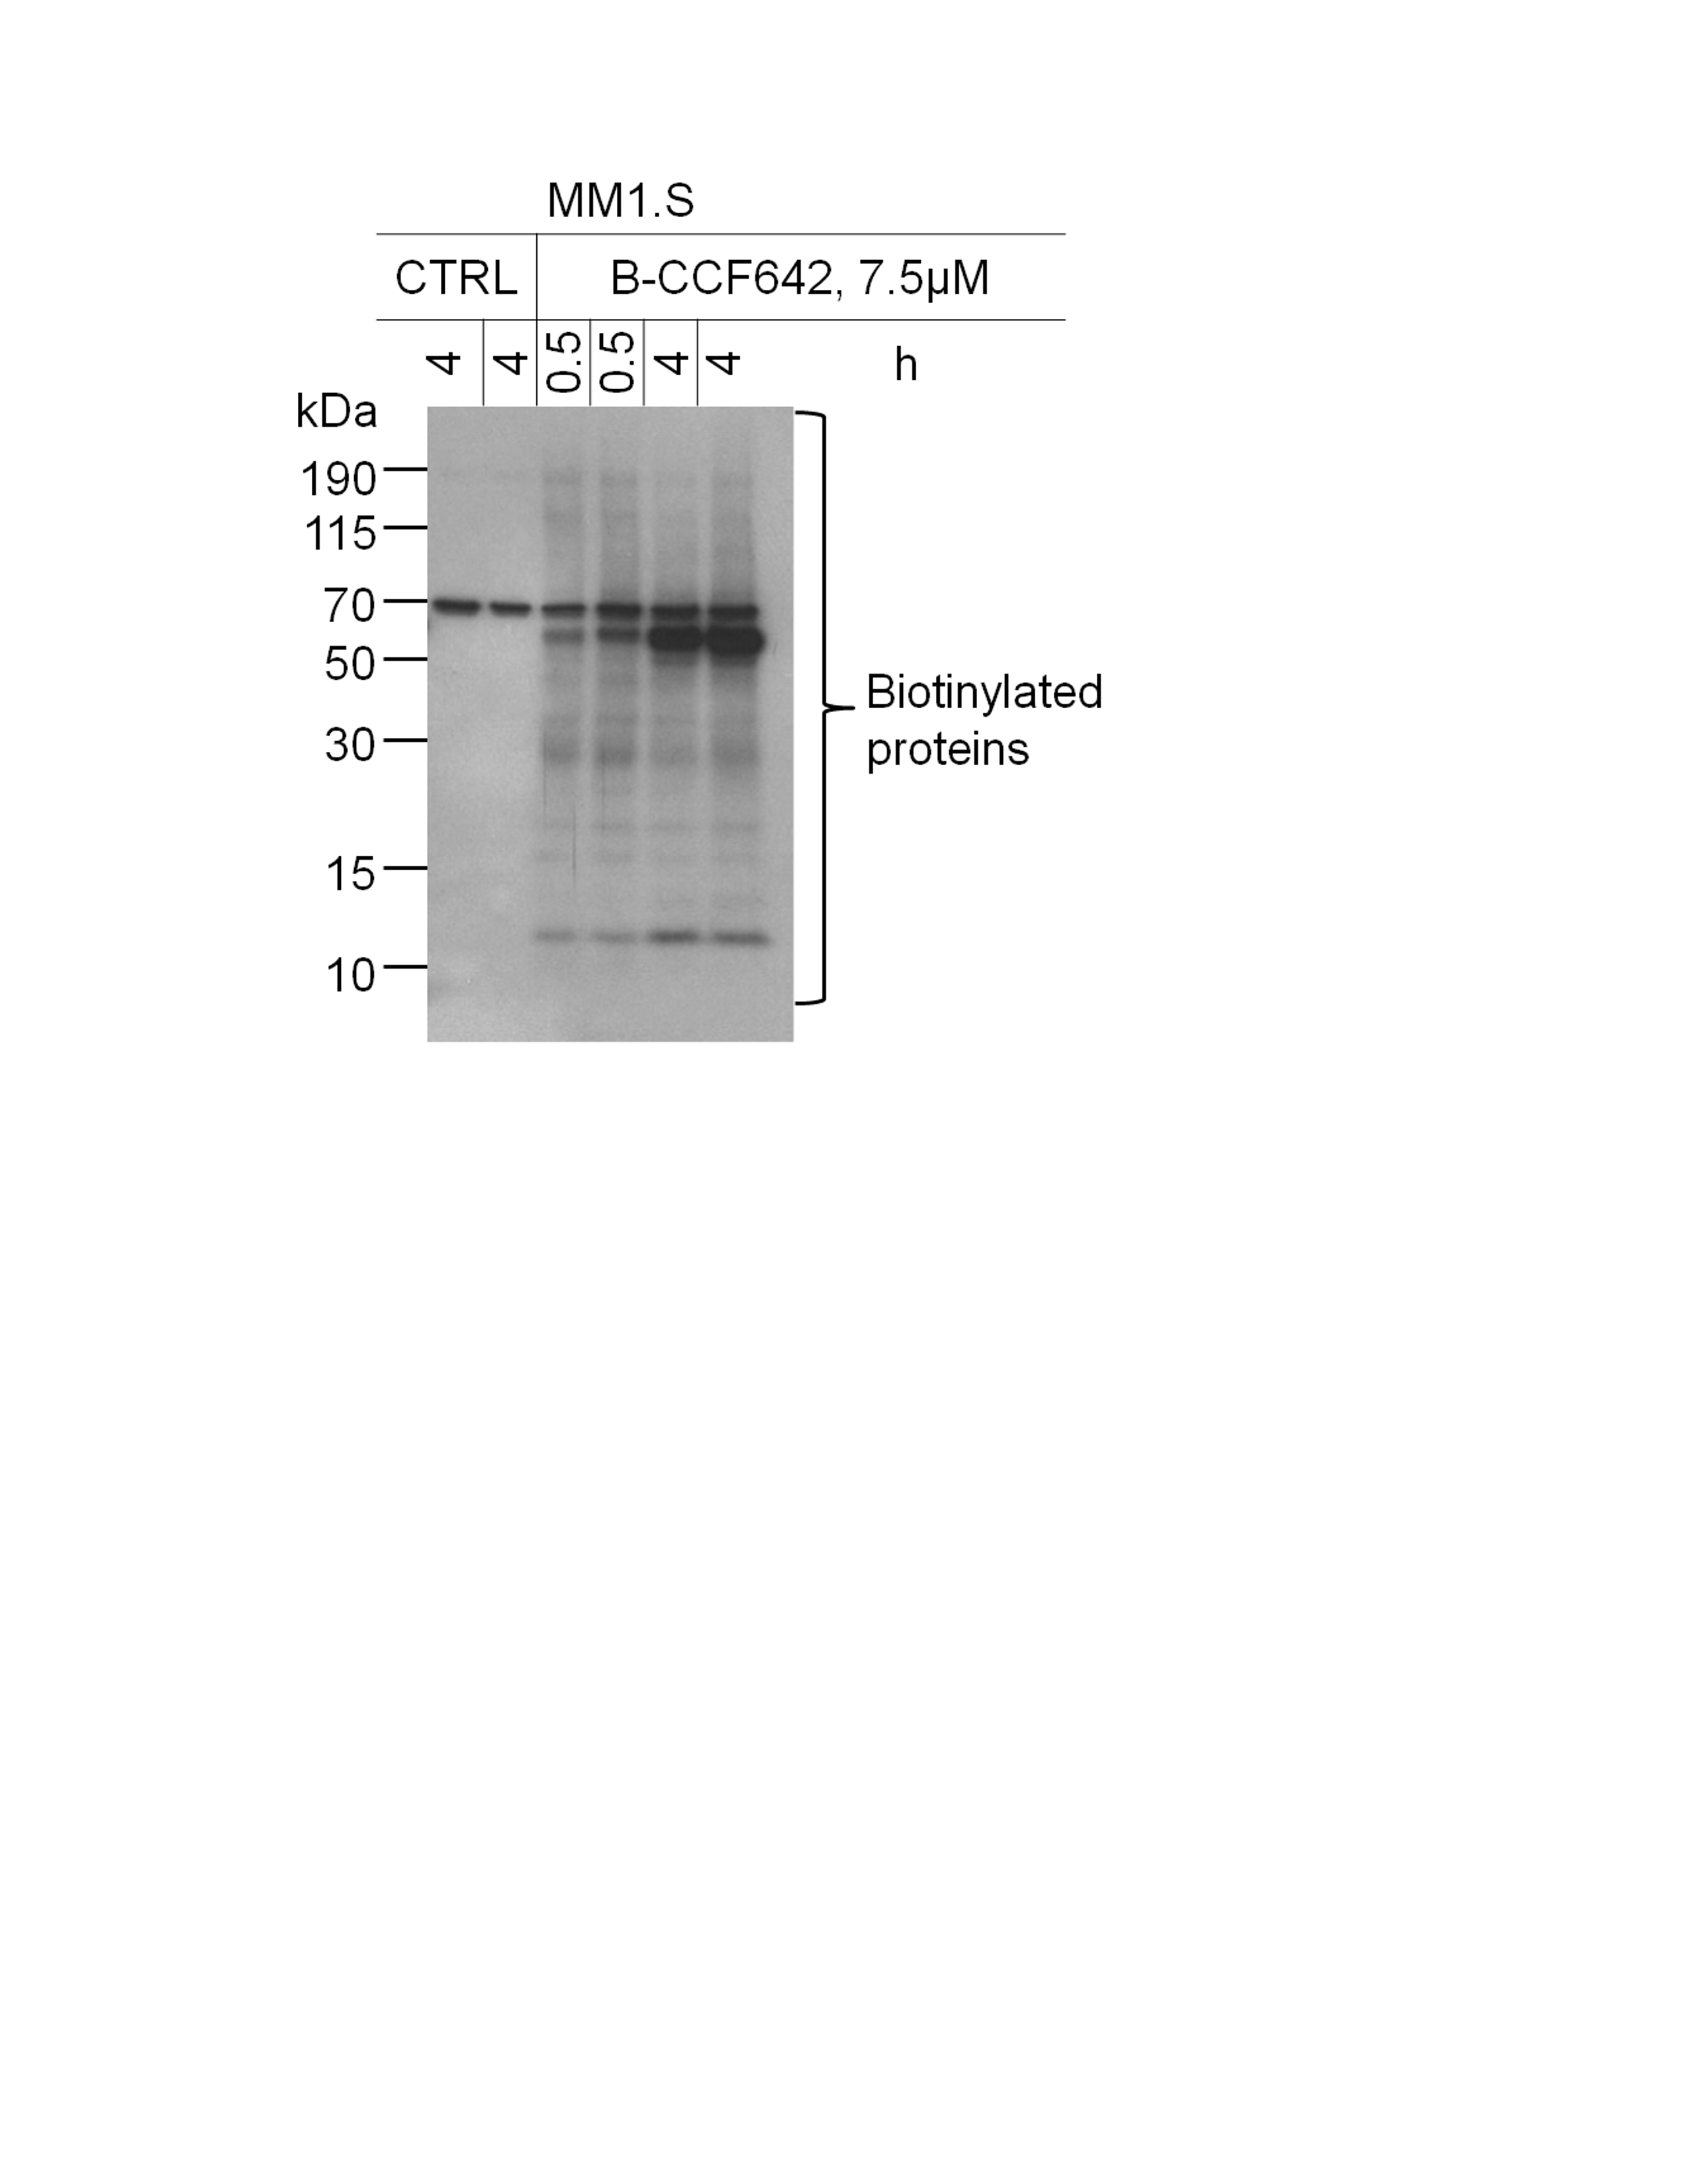
**

Supplement: 00085472can153099-sup-158057_1_supp_3349728_b2bvfv.doc [file 00085472can153099-sup-158057_1_supp_3349728_b2bvfv.doc]
